# Supplementary material for: The fail-safe mechanism of post-transcriptional silencing of unspliced HAC1 mRNA
Source: eLife journal article supplement (doi:10.7554/elife.20069), 2016-10-01
Supplement: figures [file elife-20069-figures-v3.pdf]

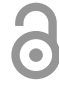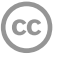

---

## Figures and figure supplements

The fail-safe mechanism of post-transcriptional silencing of unspliced *HAC1* mRNA

**Rachael Di Santo et al**

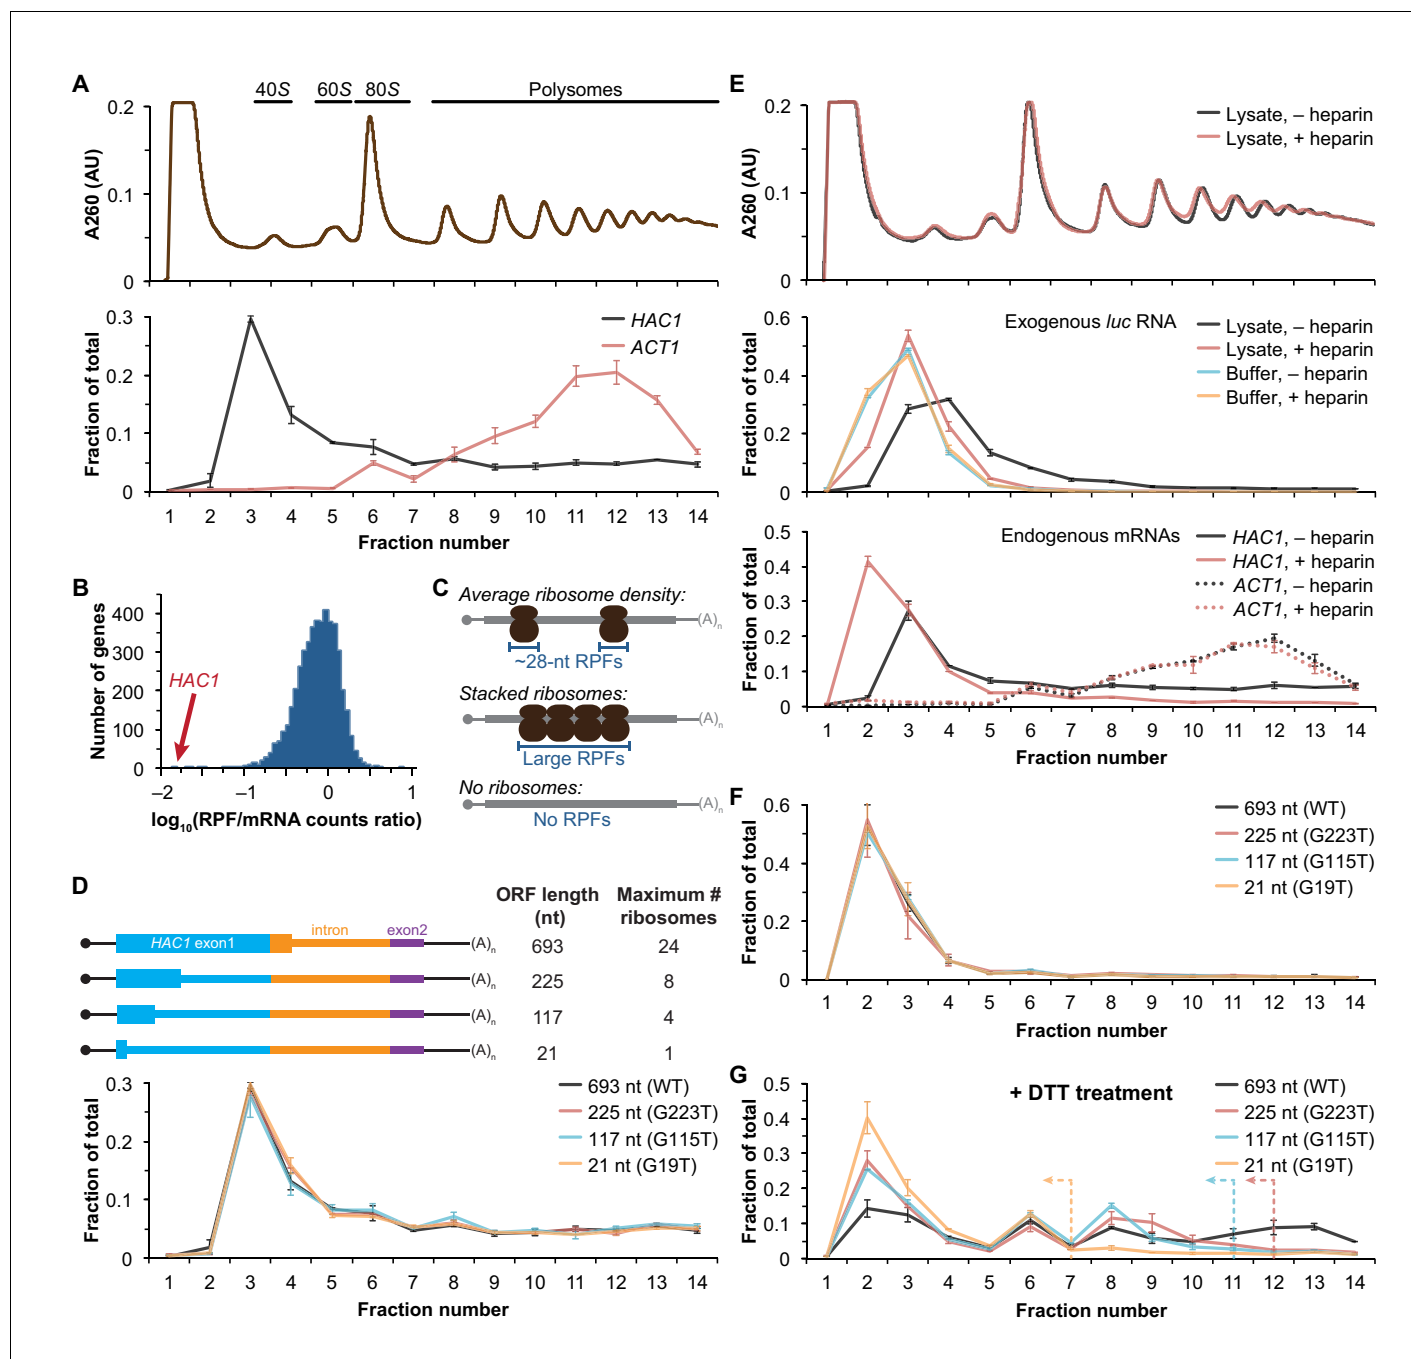

**Figure 1.** Ribosome density on unspliced *HAC1* mRNA. (A) Polysome analysis of *HAC1* and *ACT1* mRNAs. Extracts prepared from exponentially growing yeast cells were fractionated on 10–50% sucrose gradients, with absorbance at 260 nm monitored (top). The relative distributions of *HAC1* and *ACT1* mRNAs across fractions were determined by qRT-PCR (bottom). Shown are the mean  $\pm$  SEM with  $n = 2$  (i.e., the range), expressed as a fraction of the total mRNA detected. (B) Histogram of ribosome densities measured by ribosome profiling and RNA-seq. The ratio of the number of ribosome-protected fragments (RPFs) to the number of RNA-seq reads (mRNA counts) was calculated for each of 4838 expressed yeast genes (data from Weinberg et al., 2016). Shown is the distribution of log-transformed ratios in bins of 0.05, with the position of *HAC1* indicated. (C) Possible scenarios to explain a lack of RPFs. While an mRNA with average ribosome density will generate many ~28 nucleotide (nt) RPFs (top), the close packing of stacked ribosomes could inhibit the RNase digestion between ribosomes required to generate ~28 nt RPFs (middle). Alternatively, an mRNA that does not contain translating ribosomes would not generate RPFs (bottom). (D) Polysome analysis of *HAC1* mRNA variants with shortened ORFs. G-to-T point mutations were introduced into the first exon of *HAC1* to generate premature stop codons, with the resulting ORFs shown as thick colored boxes (constitutive 5'- and 3'-UTRs located within exons 1 and 2, respectively, are shown as thin black lines; other untranslated regions are depicted as thin colored boxes; and the coding regions of exons 1 (teal) and 2 (purple) are labeled as '*HAC1* exon1' and '*HAC1* exon2', respectively). The maximum number of

Figure 1 continued on next page

## Figure 1 continued

ribosomes that could be accommodated was calculated based on each ribosome occupying 28 nt. Polysome analysis was performed as in (A), with data for wild-type *HAC1* from (A) duplicated for comparison. (E) Effects of heparin on polysome analysis. Purified uncapped *luciferase* (*luc*) RNA was added to either lysate or lysis buffer in the absence (–) or presence (+) of 0.2 mg/ml heparin. Polysome analysis was performed as in (A) with absorbance at 260 nm monitored (top), and the relative distributions of exogenous *luc* RNA (middle) and endogenous *HAC1* and *ACT1* mRNAs (bottom; in lysate only) were determined. (F) Refined polysome analysis of *HAC1* mRNAs. Extracts were prepared in heparin-containing lysis buffer from strains shown in (D). Polysome analysis was performed as in (A). (G) Polysome analysis of *HAC1* mRNAs during the UPR. Strains shown in (D) were grown to mid-log phase and treated with 8 mM DTT for 20 min before harvesting. Extracts were prepared in heparin-containing lysis buffer, and polysome analysis was performed as in (A). Dotted lines indicate the fractions after which the corresponding color-coded mutant mRNAs would not be expected to sediment based on ORF length.

DOI: [10.7554/eLife.20069.003](https://doi.org/10.7554/eLife.20069.003)

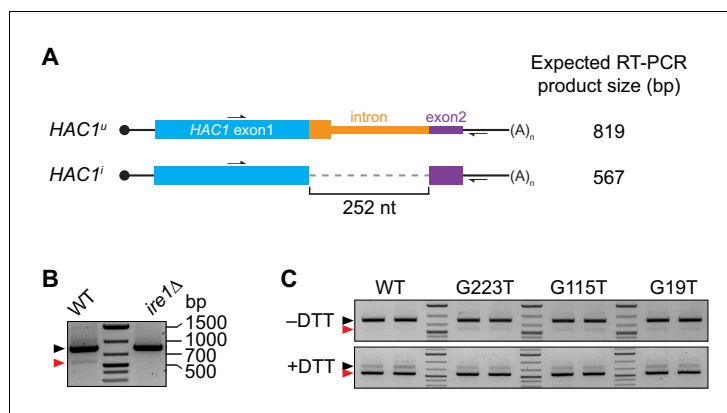

**Figure 1—figure supplement 1.** Splicing of *HAC1* mRNA. (A) Design of RT-PCR assay for *HAC1* splicing. To differentiate between the *HAC1<sup>u</sup>* and *HAC1<sup>i</sup>* mRNAs, reverse-transcription products are PCR amplified using a pair of primers that flank the intron. The resulting PCR products are separated by agarose gel electrophoresis, with a size difference of 252 base pairs (bp) corresponding to the size of the intron. (B) Splicing status of *HAC1* mRNA. Total RNA was extracted from exponentially growing yeast cells of the indicated genotypes. RT-PCR across the intron was used to differentiate between unspliced (black arrow) and spliced (red arrow) *HAC1* mRNA. The small percentage of spliced *HAC1* mRNA observed in wild-type cells is *IRE1* dependent, as expected. (C) Splicing of *HAC1* mRNA variants upon DTT treatment. Strains expressing the indicated *HAC1* variants were grown to mid-log phase and either left untreated (–DTT) or treated with 8 mM DTT for 20 min (+DTT) before harvesting. Total RNA was extracted and used for RT-PCR analysis as in (A). The same cultures (two of each strain) were used for polysome analysis in **Figure 1F and G**.

DOI: [10.7554/eLife.20069.004](https://doi.org/10.7554/eLife.20069.004)

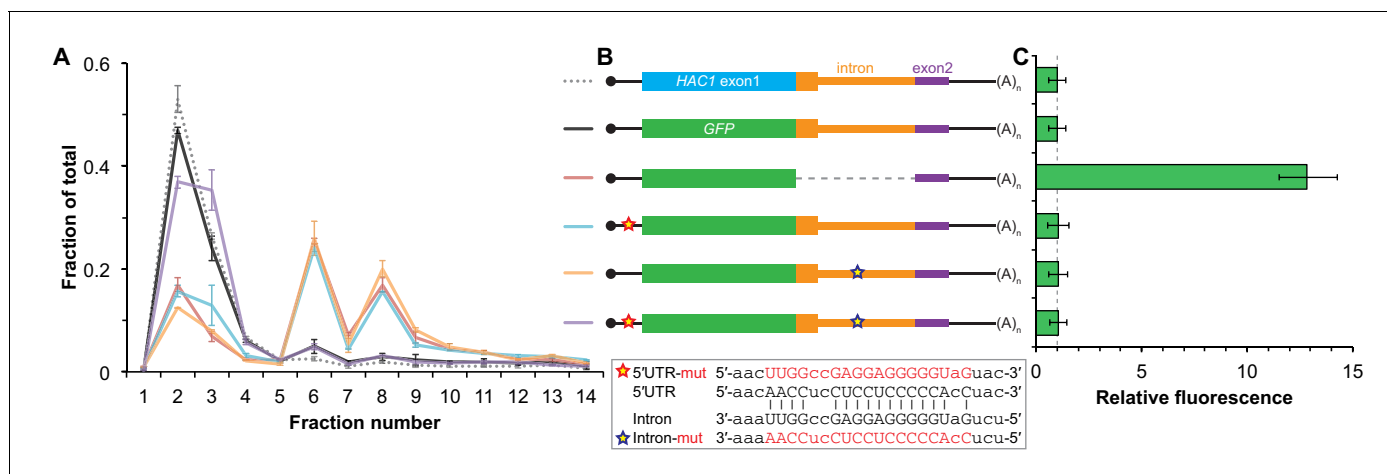

**Figure 2.** Contribution of long-range base pairing to intron-dependent silencing. (A) Polysome analysis of reporter mRNAs. Extracts were prepared in heparin-containing lysis buffer from strains expressing the *GFP* reporter mRNAs depicted in (B). Polysome analysis was performed as in Figure 1A, with data for wild-type *HAC1* from Figure 1F duplicated for comparison. (B) Design of reporter mRNAs. Constructs are depicted as in Figure 1D, with the dotted line indicating a deleted region. Colored stars indicate mutations to the base-pairing region, with specific nucleotide changes shown below in red. (C) Flow cytometry analysis of reporter strains. Strains expressing the *GFP* reporter mRNAs depicted in (B) were grown to mid-log phase and analyzed by flow cytometry. Plotted is the median GFP intensity (normalized to cell size) of the cell population relative to background fluorescence in the wild-type (no GFP) strain with error bars indicating quartiles of the cell population, all averaged across replicates ( $n = 2-7$ ).

DOI: [10.7554/eLife.20069.005](https://doi.org/10.7554/eLife.20069.005)

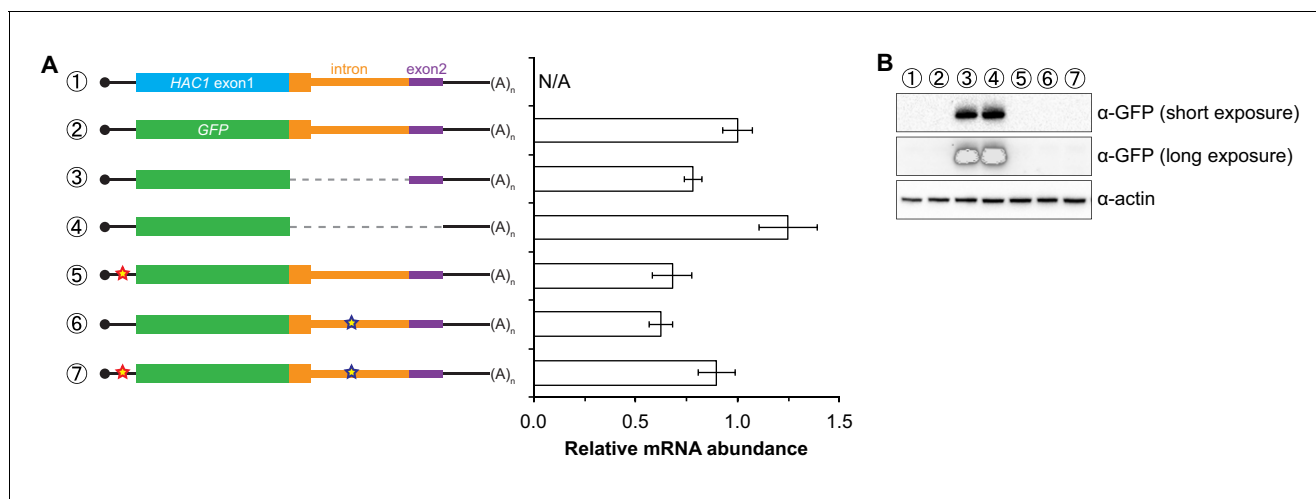

**Figure 2—figure supplement 1.** Characterization of *GFP* reporter strains. (A) RNA abundance measurements for *GFP* reporter mRNAs. Total RNA was extracted from strains expressing the indicated mRNAs, using the same cultures as for flow cytometry analyses in **Figure 2C**. qRT-PCR was used to measure the abundances of *GFP* reporter mRNAs relative to *ACT1* mRNA, with all data normalized to the abundance of the ‘wild-type’ *GFP* reporter mRNA (construct 2). Shown are the mean  $\pm$  SD ( $n = 2$ –7). (B) Immunoblotting analysis of reporter strains. Proteins were extracted from mid-log-phase cultures of strains expressing the indicated reporter mRNAs depicted in (A). Immunoblots for the GFP reporter and actin loading control are shown. No signal for GFP is observed in the base-pairing mutants (constructs 5 and 6) even after overexposing the blot, consistent with the corresponding flow cytometry results (**Figure 2C**).

DOI: [10.7554/eLife.20069.006](https://doi.org/10.7554/eLife.20069.006)

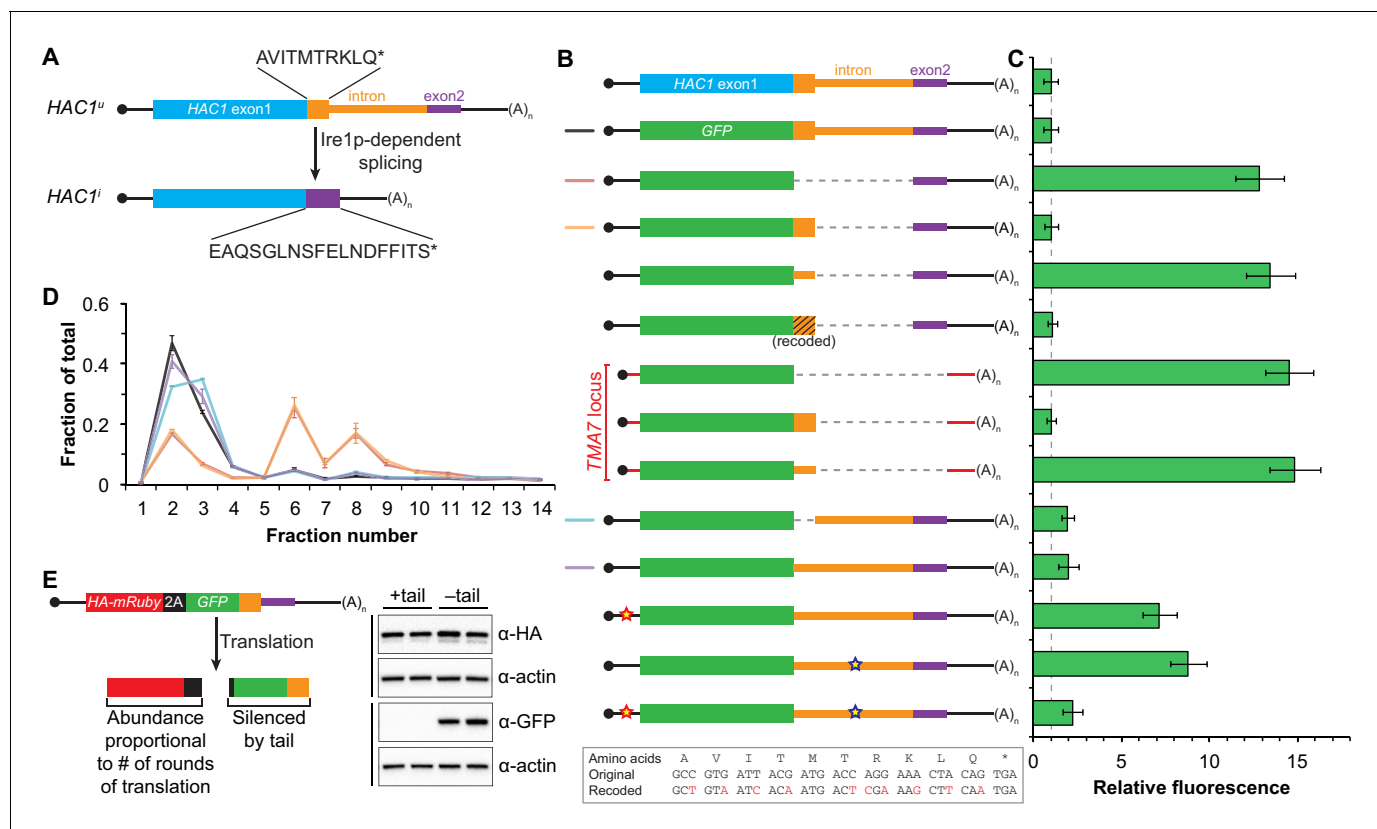

**Figure 3.** Post-translational silencing mediated by the intron-encoded C-terminal tail. **(A)** Schematic of *HAC1* mRNA splicing. The proteins encoded by *HAC1<sup>u</sup>* and *HAC1<sup>l</sup>* mRNAs differ in their C-terminal tails, with the amino acid sequences indicated. **(B)** Design of reporter mRNAs. Black shading indicates recoding, with the original and recoded sequences depicted below (mutations in red). Untranslated regions colored red correspond to those of the *TMA7* mRNA, with the reporter gene integrated at the *TMA7* rather than *HAC1* locus. Otherwise constructs are depicted as in **Figure 2B**. **(C)** Flow cytometry analysis of reporter strains. Strains expressing the GFP reporter mRNAs depicted in **(B)** were analyzed as in **Figure 2C**, with data for the first three strains duplicated from **Figure 2B** for comparison. **(D)** Polysome analysis of reporter mRNAs. Extracts were prepared in heparin-containing lysis buffer from strains expressing the GFP reporter mRNAs indicated in **(B)**. Polysome analysis was performed as in **Figure 1A**, with data for the wild-type and intronless GFP reporters from **Figure 2A** duplicated for comparison. **(E)** Differentiating between co-translational and post-translational silencing mechanisms. Left: Schematic of reporter construct that generates two separate polypeptides from each round of translation. Right: Extracts were prepared from strains expressing reporter mRNAs that either encoded the 10-amino-acid C-terminal tail of *Hac1<sup>u</sup>* (+tail) or contained a stop codon just before the tail (-tail). Immunoblotting was used to detect HA-tagged mRuby (top) and GFP (bottom), with actin as a loading control. Two biological replicates are shown for each genotype.

DOI: [10.7554/eLife.20069.007](https://doi.org/10.7554/eLife.20069.007)

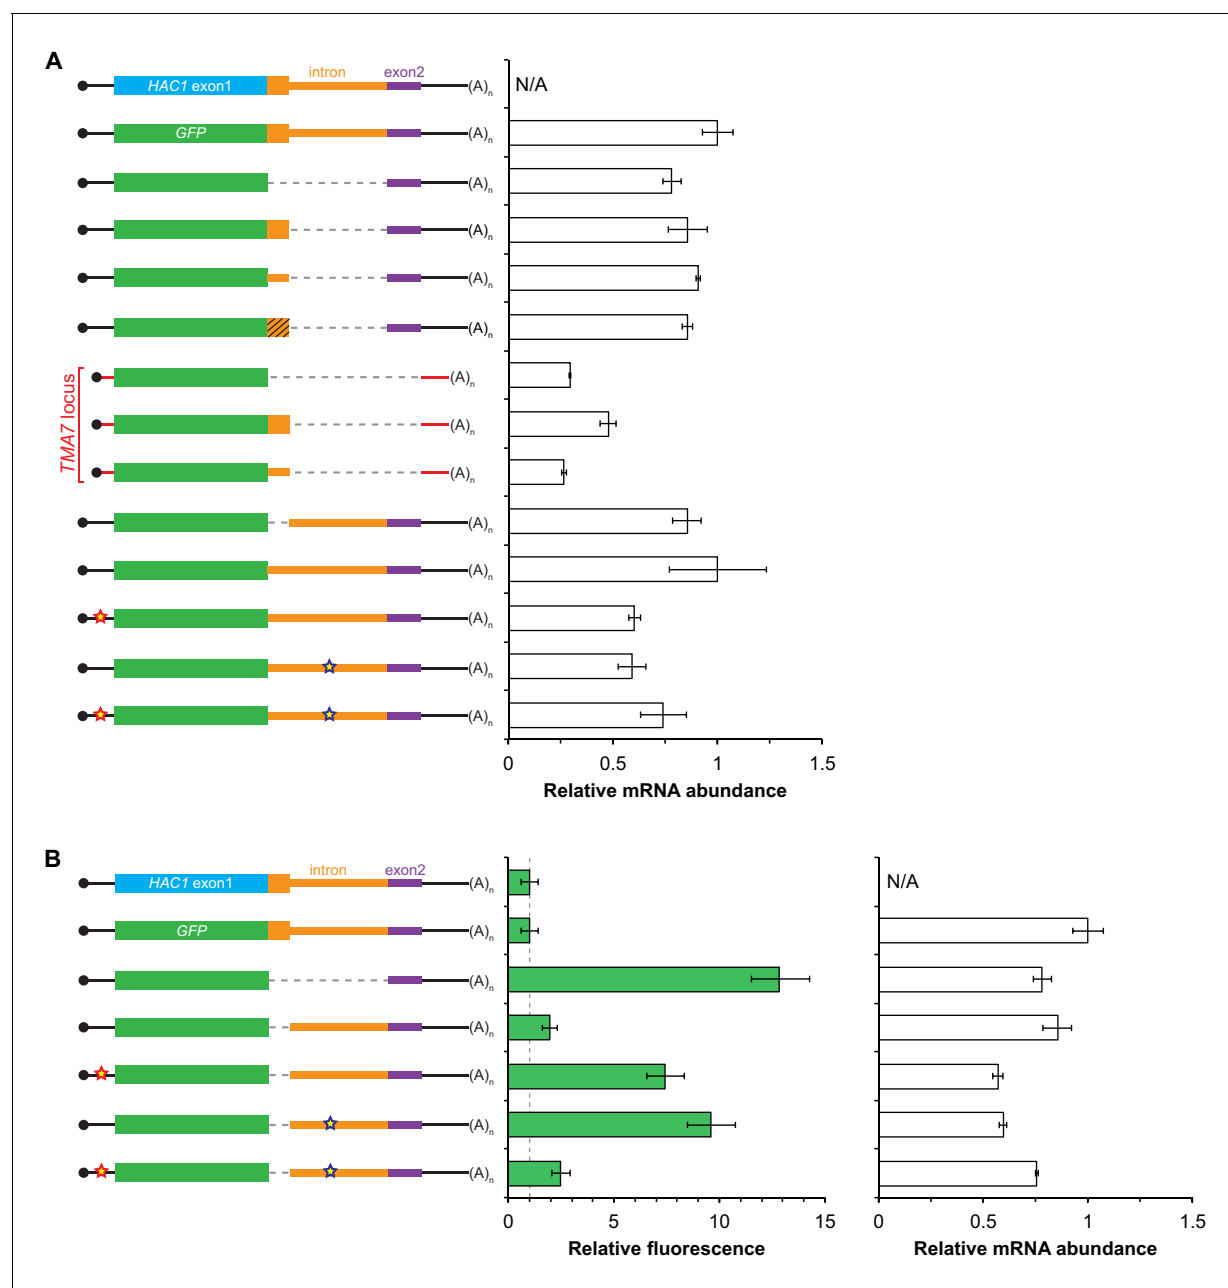

**Figure 3—figure supplement 1.** Additional analyses of *GFP* reporter constructs. (A) RNA abundance measurements for *GFP* reporter mRNAs, analyzed as in **Figure 2—figure supplement 1A** using the same cultures as for flow cytometry analyses in **Figure 3C**. (B) Flow cytometry and RNA analyses of additional reporter strains. Strains expressing the indicated *GFP* reporter mRNAs (left) were analyzed by flow cytometry as in **Figure 2C** (middle) or qRT-PCR as in **Figure 2—figure supplement 1A** (right), with data for the first four strains duplicated from **Figure 3C** and **Figure 3—figure supplement 1A** for comparison.

DOI: [10.7554/eLife.20069.008](https://doi.org/10.7554/eLife.20069.008)



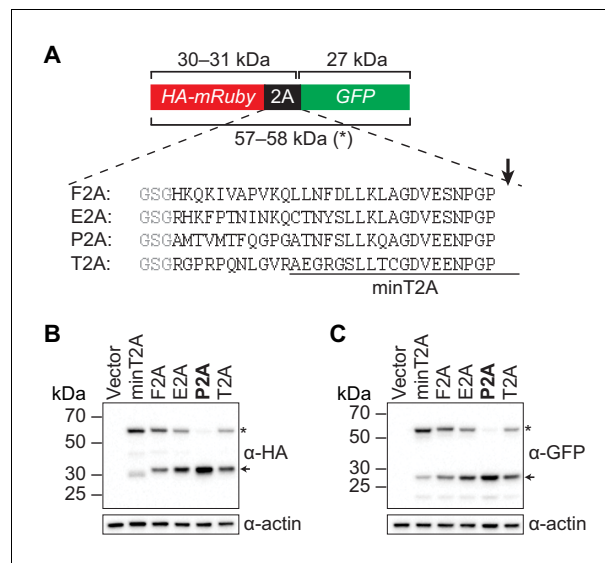

**Figure 3—figure supplement 2.** Identifying a 2A peptide sequence that is active in *S. cerevisiae*. (A) Design of the 2A reporter construct. In the absence of 2A activity, a 57–58 kDa polypeptide (\*) is produced that contains both an HA tag and GFP. When the 2A sequence is active, translation of the reporter generates a 30–31 kDa HA-tagged protein and a 27 kDa GFP. Shown are the 30-amino-acid sequences of the 2A peptides that were tested, with each preceded by a GlySerGly linker (gray) and ‘cleaved’ at the site marked with an arrow. The region corresponding to a minimal 20-amino-acid T2A peptide (‘minT2A’) that has been used previously in yeast (Beekwilder et al., 2014) is indicated. Minimal versions of the F2A peptide have also been used in yeast (Doronina et al., 2008; de Felipe et al., 2003; Sharma et al., 2012; Voordeckers et al., 2012) but with ‘cleavage’ efficiencies that were low or not directly measured. (B–C) Analysis of 2A activity by immunoblotting. BY4741 was transformed with a pRS413-derived centromeric plasmid containing the indicated reporter construct under control of the *GPD* promoter. Proteins were extracted from mid-log-phase cultures and analyzed for HA- (B) and GFP- (C) tagged proteins by immunoblotting. Only the P2A peptide causes efficient separation of the upstream and downstream proteins (indicated by arrows). The nucleotide sequences encoding the 30-amino-acid peptides are:

F2A: CACAAACAAAAGATTGTTGCGCCTGTGAAACAGCTTTTGAACCTTGACCTGCTCAAG  
 TTGGCAGGAGACGTCGAGTCCAACCCTGGGCCT  
 E2A: AGACATAAATTTCCCACTAACATCAACAAACAGTGTACTAATTACTCTCTCCTCAAATTGGCTGGAGATG  
 TTGAGAGCAACCCTGGC CCC  
 P2A: GCTATGACTGTGATGACATTCCAGGGACCAGGTGCAACAACTTCTCCCTCTTGAAACAAGCAGGAGA  
 TGTGAGGAAAATCCCGGGCCT  
 T2A: CGGGGGCCTCGCCCCAAAACCTTGGGGTAAGGGCCGAGGGCAGGGGAAGTCTTCTAACA  
 TCGGGGACGTGGAGGAAAATCCCGGGCCCC

DOI: 10.7554/eLife.20069.009

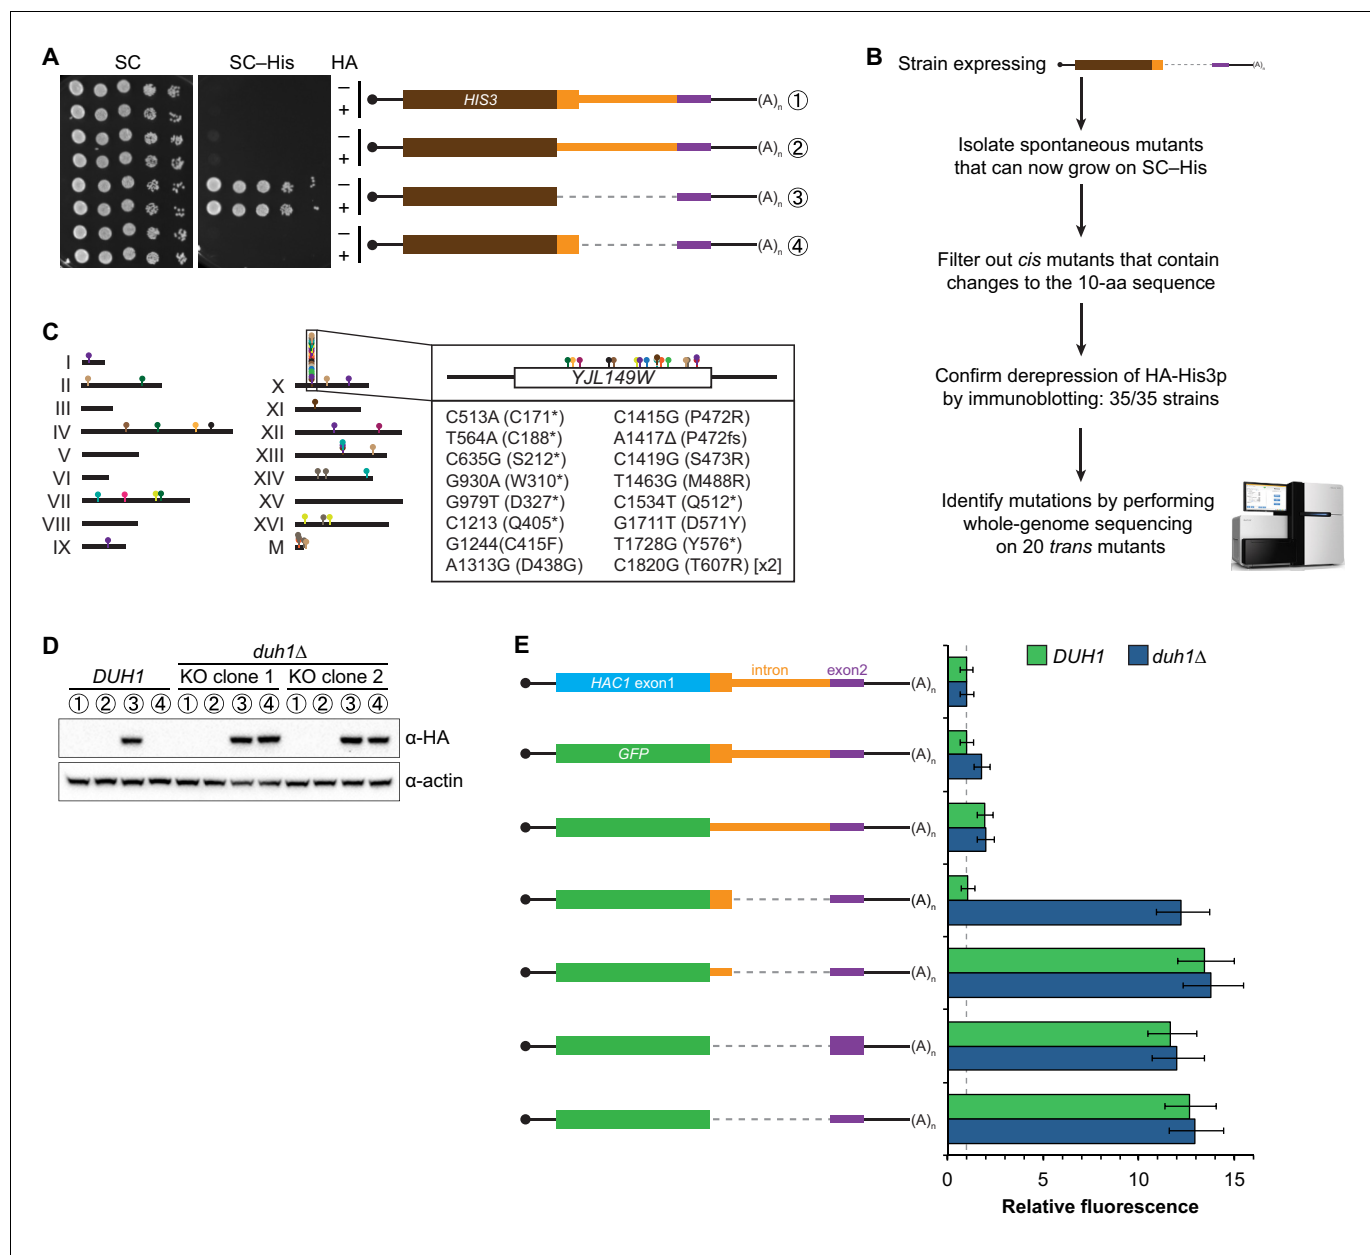

**Figure 4.** Identification of *DUH1* through a genetic selection. (A) Evaluating a genetic reporter for intron-dependent silencing. Strains expressing the indicated *HAC1*-based *HIS3* reporter mRNAs (depicted as in **Figure 2B**) either without (–) or with (+) an N-terminal HA tag were grown to saturation, and 10-fold dilution series were plated on either SC or SC-His media. (B) Flowchart of genetic selection for *dds* mutants. After selecting for spontaneous mutants that could grow on medium lacking histidine, restreaked clones were filtered out for *cis* mutants, verified to be expressing HA-His3p, and a subset analyzed by whole-genome sequencing. (C) Chromosome map of mutations identified by whole-genome sequencing. Each color corresponds to a different *dds* mutant strain. Shown on the right is the *DUH1* locus (YJL149W), with locations of nucleotide changes (with respect to *DUH1* start codon) and corresponding amino changes listed below. (D) Effect of *DUH1* disruption on expression of the genetic reporter. Strains expressing the indicated reporter mRNAs depicted in (A) in either a *DUH1* or *duh1Δ* (two independent clones) background were grown to mid-log phase. Extracts were prepared and immunoblotted for HA-His3p and actin loading control. (E) Flow cytometry analysis of reporter strains. Strains expressing the indicated GFP reporter mRNAs in either a *DUH1* or *duh1Δ* background were analyzed as in **Figure 2C**. Data is plotted as in **Figure 2C** ( $n = 2$  for all strains).

DOI: [10.7554/eLife.20069.010](https://doi.org/10.7554/eLife.20069.010)

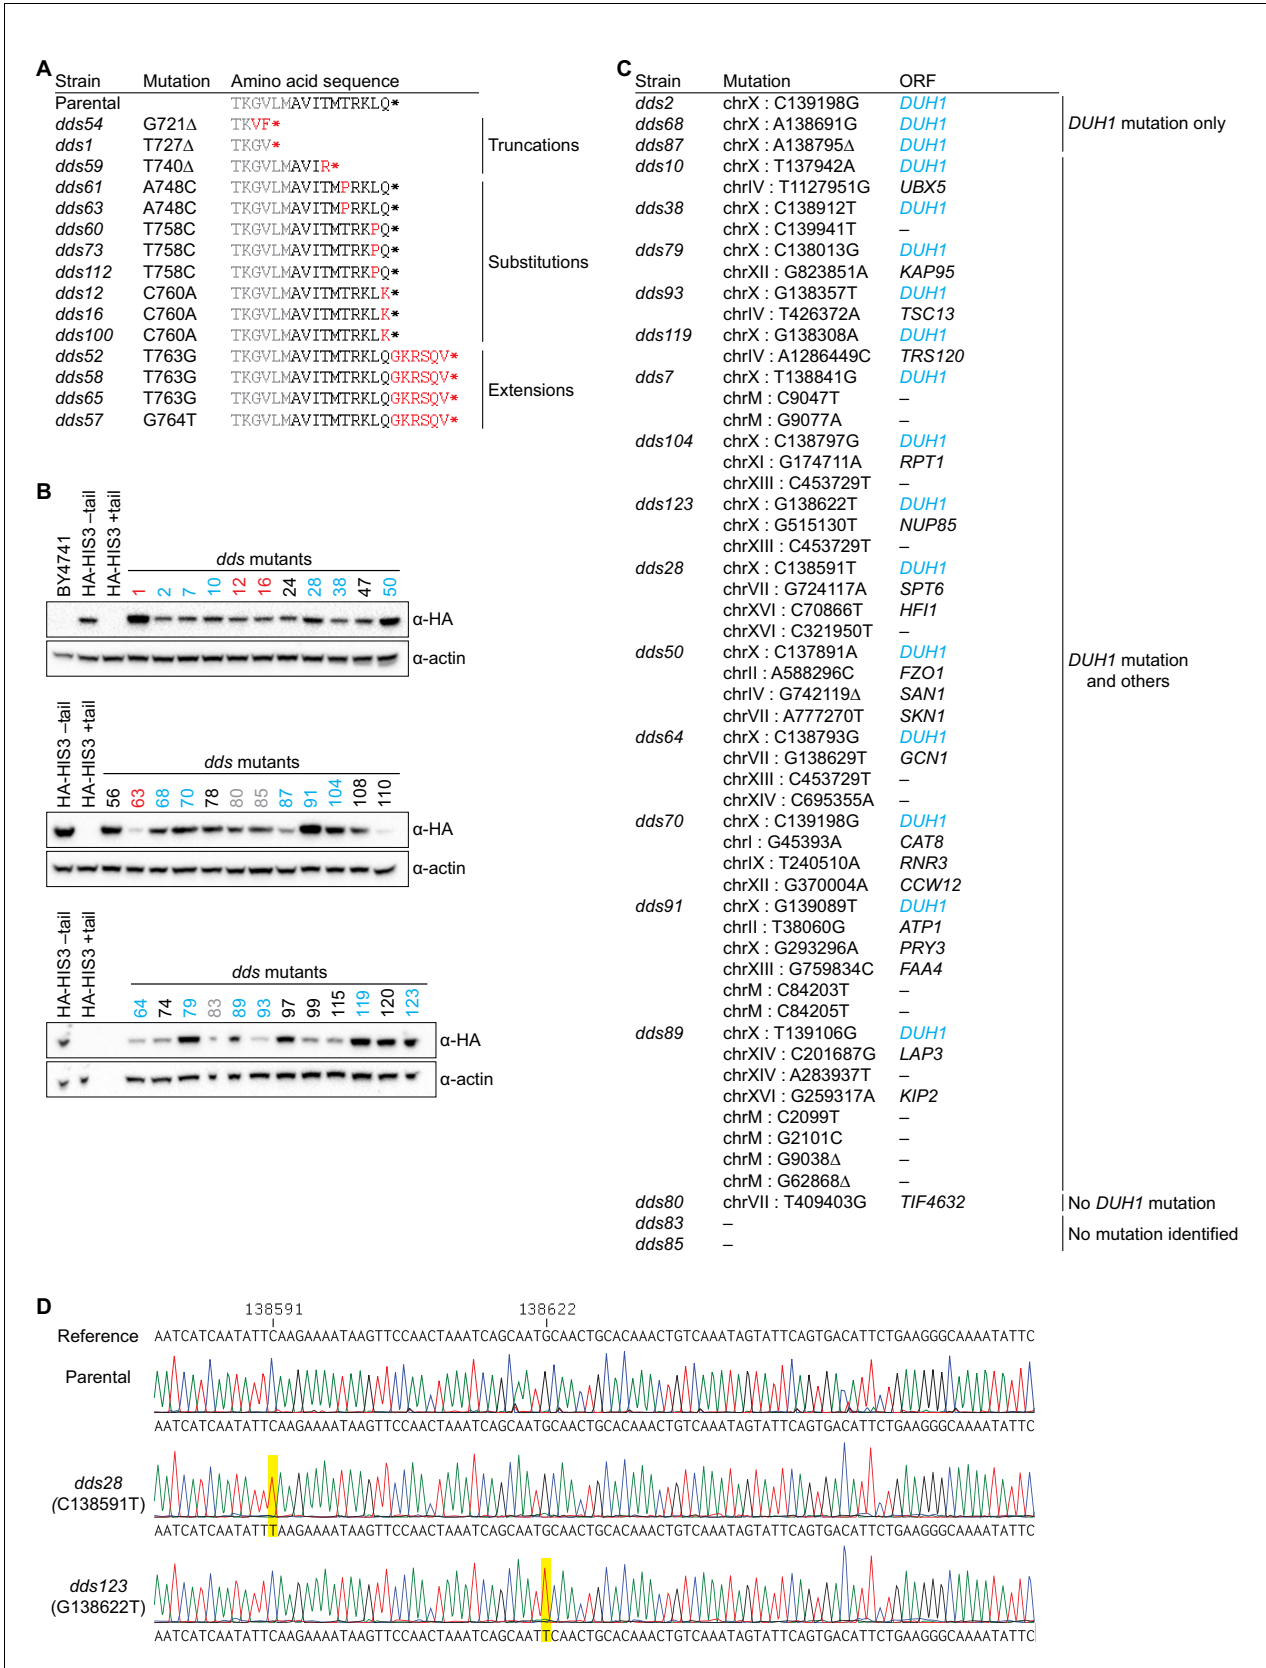

**Figure 4—figure supplement 1.** Results and validation of the genetic selection. (A) Table of *cis*-acting mutations identified by Sanger sequencing. In the parental strain, the Hisp3-coding sequence is shown in gray while the 10-amino-acid degreen is shown in black. Amino-acid changes caused by Figure 4—figure supplement 1 continued on next page

## Figure 4—figure supplement 1 continued

nucleotide mutations are shown in red. (B) Analysis of HA-His3p abundance in *dds* mutant strains. Protein extraction and immunoblotting were performed as in **Figure 4D**, using untagged BY4741 as a negative specificity control for the HA antibody. Strains indicated in red contain mutations in the HA-His3p +tail reporter gene. Strains that were subjected to whole-genome sequencing are indicated in blue and gray, with blue indicating those that contain a mutation in *DUH1* and gray indicating those that do not. (C) Table of *trans*-acting mutations identified by whole-genome sequencing. Strains containing *DUH1* mutations are listed in order of increasing total number of mutations. (D) Representative example of Sanger sequencing confirmation of *DUH1* mutations. Shown are sequencing traces across a region of *DUH1* for the parental selection strain and two *dds* mutants. Each *dds* mutant contains a nucleotide substitution (highlighted in yellow), compared to both the reference sequence and parental selection strain, corresponding to the mutation identified by whole-genome sequencing.

DOI: [10.7554/eLife.20069.011](https://doi.org/10.7554/eLife.20069.011)

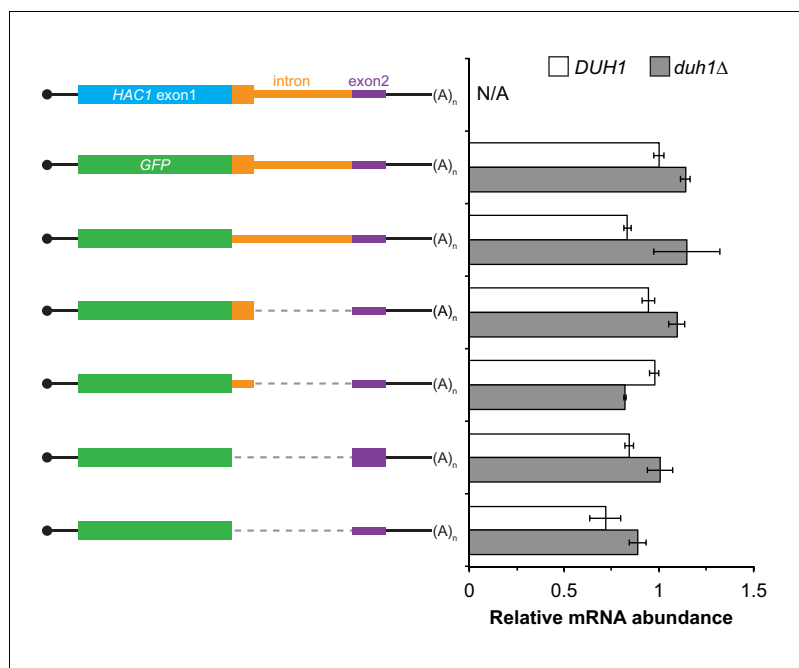

**Figure 4—figure supplement 2.** Additional analysis of *GFP* reporter constructs. RNA abundance measurements for *GFP* reporter mRNAs in the indicated strain backgrounds, analyzed as in **Figure 2—figure supplement 1A** using the same cultures as for flow cytometry analyses in **Figure 4E**.

DOI: [10.7554/eLife.20069.012](https://doi.org/10.7554/eLife.20069.012)

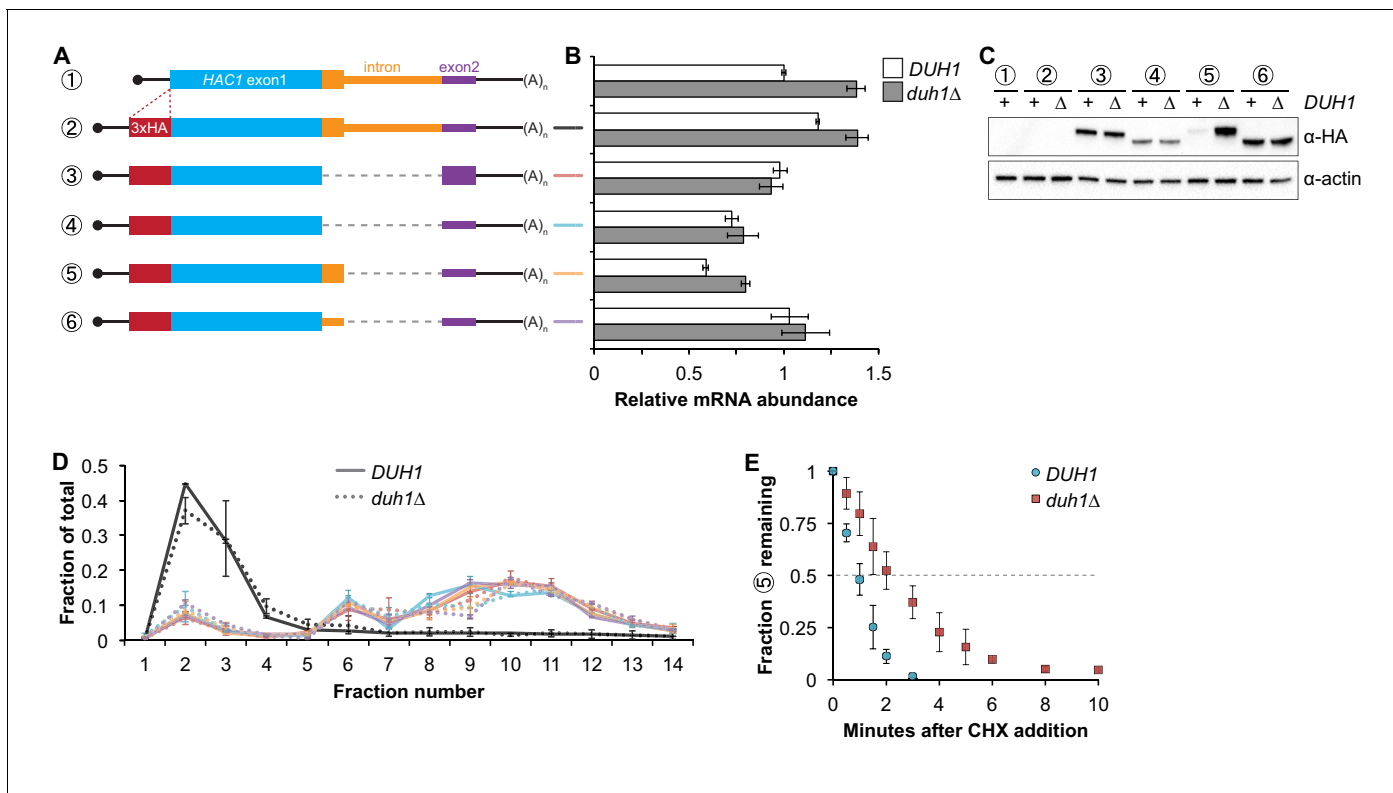

**Figure 5.** Effects of *DUH1* on expression and stability of Hac1p. (A) Design of 3xHA-tagged *HAC1* mRNA variants. Constructs are depicted as in Figure 2B, with the location of the N-terminal 3xHA tag indicated. (B) RNA abundance measurements for *HAC1* mRNA variants. Total RNA was extracted from strains expressing the indicated mRNAs in either a *DUH1* or *duh1Δ* background. qRT-PCR was used to measure the abundances of *HAC1* variants relative to *ACT1* mRNA, with all data normalized to the abundance of construct 1 in strain BY4741. Shown are the mean  $\pm$  SD ( $n = 2$ ). (C) Effect of *DUH1* disruption on protein abundances. Strains expressing the indicated mRNAs depicted in (A) in either a *DUH1* or *duh1Δ* background were grown to mid-log phase. Extracts were prepared and immunoblotted for 3xHA-Hac1p and actin loading control. (D) Polysome analysis of 3xHA-tagged *HAC1* mRNA variants. Extracts were prepared in heparin-containing lysis buffer from strains expressing the mRNAs indicated in (A) in either a *DUH1* or *duh1Δ* background. Polysome analysis was performed as in Figure 1A. (E) Analysis of protein degradation kinetics. Strains expressing construct 5 (depicted in A) in either a *DUH1* or *duh1Δ* background were grown to mid-log phase before being treated with cycloheximide (CHX) to halt translation. At the indicated time points, aliquots of cells were quenched in dry-ice-cold methanol and harvested by centrifugation. Protein extraction and immunoblotting were performed as in (C), except that a high-sensitivity antibody was used to detect 3xHA-Hac1<sup>up</sup>. Shown are the mean  $\pm$  SD ( $n = 3$ ), expressed as a fraction of protein detected at  $t = 0$ .

DOI: 10.7554/eLife.20069.013

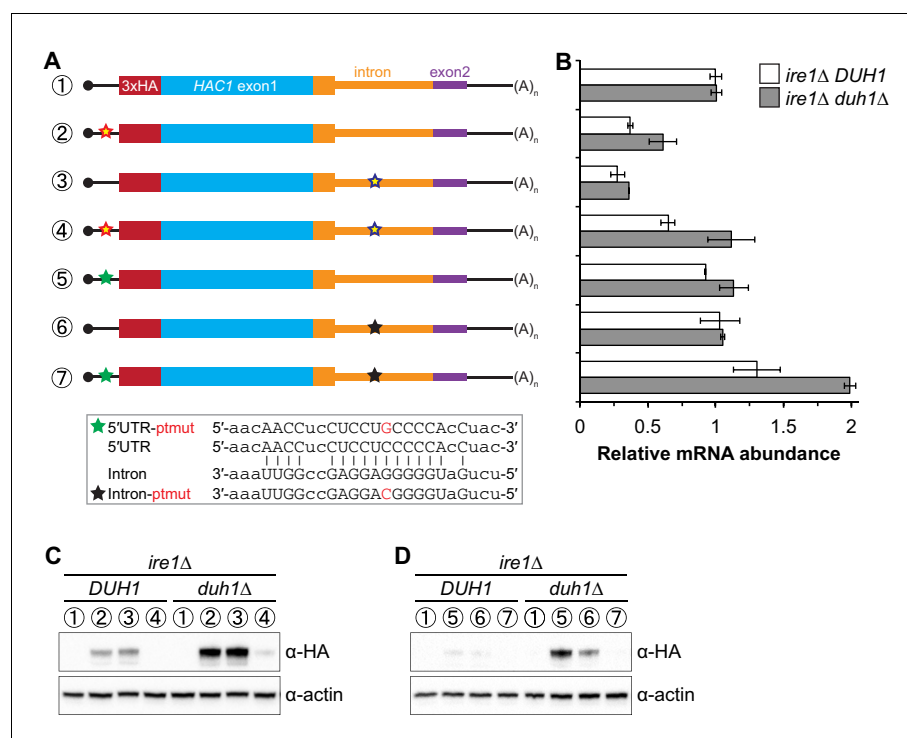

**Figure 6.** Relationship between base pairing- and degron-dependent repression. (A) Design of 3xHA-tagged *HAC1* mRNA variants. Constructs are depicted as in Figure 2B. Colored stars indicate mutations to the base-pairing region, with specific nucleotide changes shown in Figure 2B (red and blue stars) or below (green and black stars) in red. (B) RNA abundance measurements for *HAC1* mRNA variants in the indicated strain backgrounds, analyzed as in Figure 5B. (C–D) Effect of *DUH1* disruption on protein abundances. *ire1Δ* strains expressing the indicated mRNAs depicted in (A) in either a *DUH1* or *duh1Δ* background were analyzed as in Figure 5C, except that a high-sensitivity antibody was used to detect 3xHA-Hac1<sup>p</sup>.

DOI: [10.7554/eLife.20069.014](https://doi.org/10.7554/eLife.20069.014)

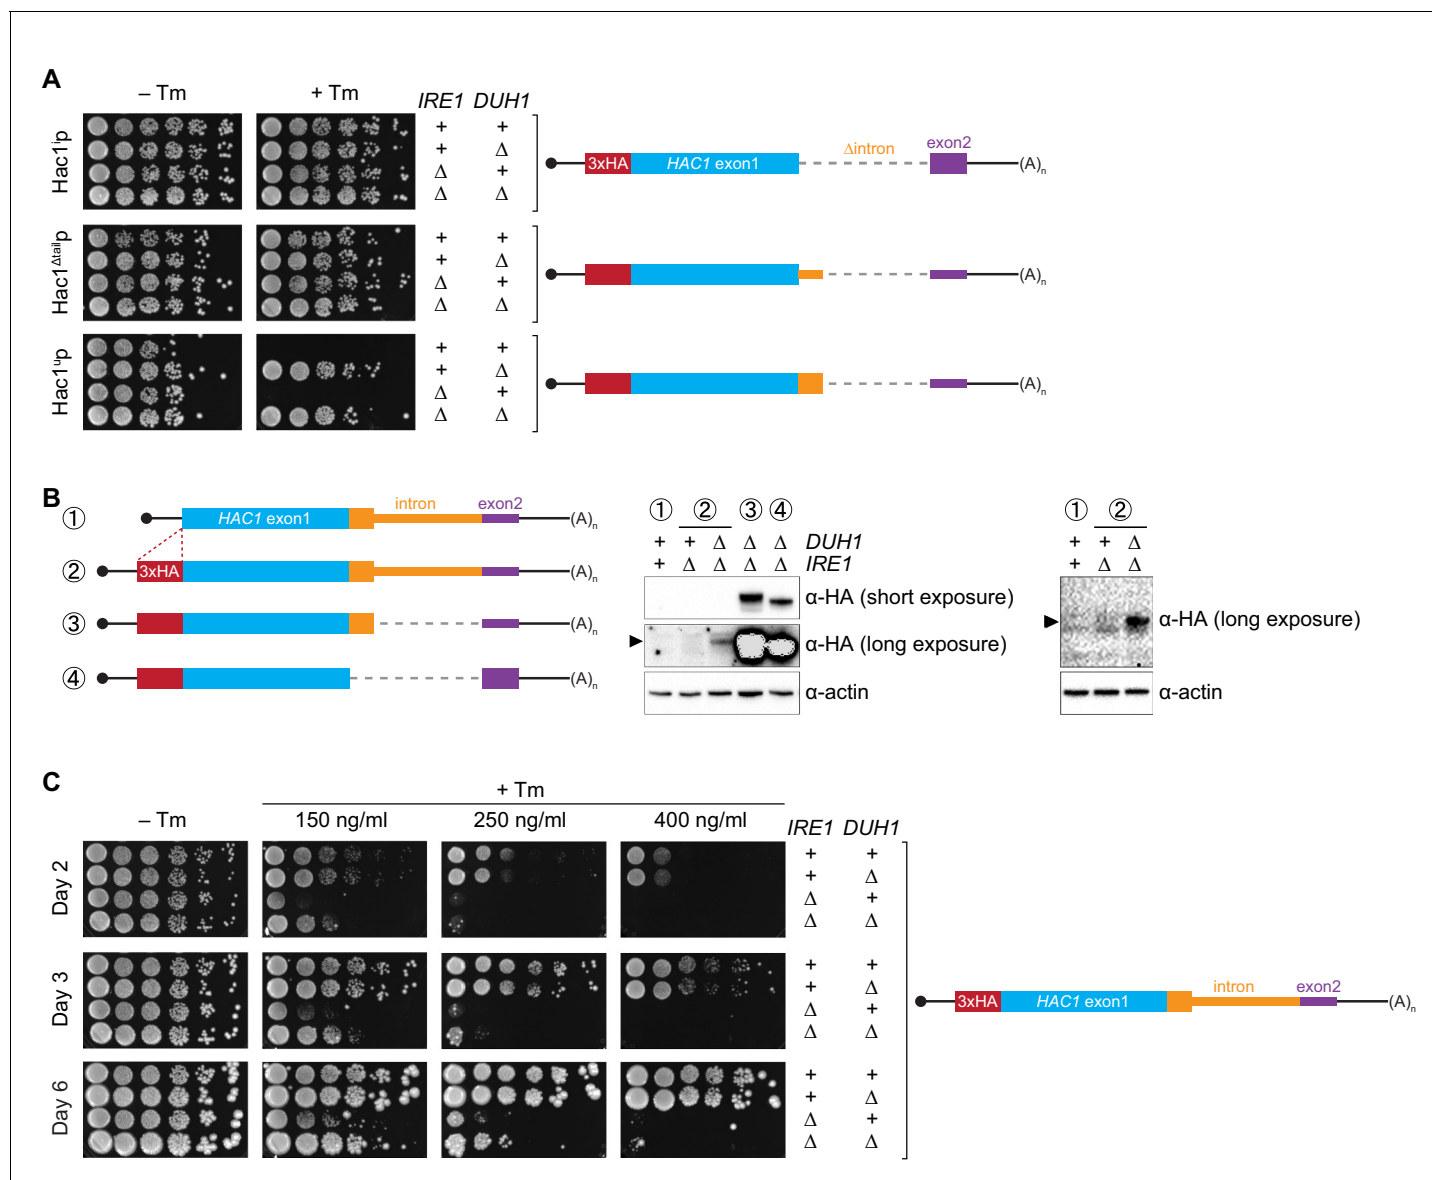

**Figure 7.** Requirement for *DUH1* to suppress Ire1p-independent activation of the UPR. (A) Analysis of Hac1p activity in the UPR. Strains expressing the indicated *HAC1* mRNA variants, with (+) or without (Δ) *IRE1* and/or *DUH1* present, were grown to saturation. 10-fold dilution series were plated on YPD without (–Tm) or with (+Tm) 400 ng/ml tunicamycin to induce ER stress. (B) Impact of *DUH1* on detection of Hac1<sup>u</sup>p. Strains expressing the indicated mRNAs, with (+) or without (Δ) *IRE1* and/or *DUH1* present, were analyzed as in **Figure 6C**. Black arrow indicates the position of Hac1<sup>u</sup>p, which migrates more slowly than Hac1<sup>1</sup>p. Construct 1, which lacks a 3xHA tag, was used as a negative control for anti-HA immunoblotting. (C) Effect of Duh1p-dependent degradation on the UPR. Strains expressing wild-type *HAC1* with an N-terminal 3xHA tag, with (+) or without (Δ) *IRE1* and/or *DUH1* present, were grown to saturation. 10-fold dilution series were plated on YPD without tunicamycin (–Tm) or containing the indicated concentration of tunicamycin (+Tm). Plates were imaged at days 2 (top), 3 (middle), and 6 (bottom).

DOI: 10.7554/eLife.20069.015



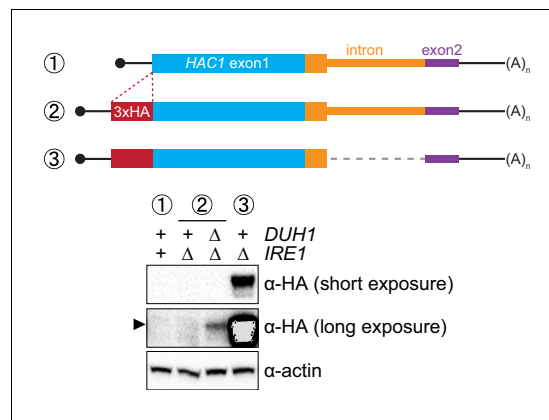

**Figure 7—figure supplement 1.** Ire1p-independent accumulation of Hac1p. Strains expressing the indicated mRNAs, with (+) or without (Δ) *IRE1* and/or *DUH1* present, were analyzed and presented as in **Figure 7B**.

DOI: [10.7554/eLife.20069.016](https://doi.org/10.7554/eLife.20069.016)

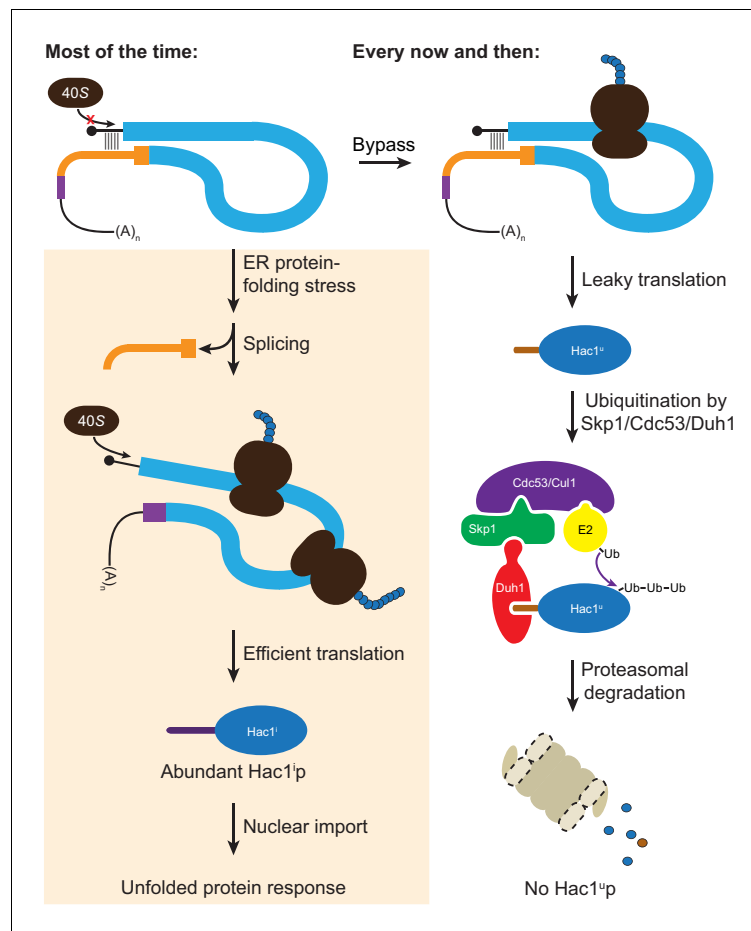

**Figure 8.** Fail-safe post-transcriptional silencing of unspliced *HAC1* mRNA. See the main text for a description.  
DOI: [10.7554/eLife.20069.017](https://doi.org/10.7554/eLife.20069.017)
