# Supplementary figures and images for: The fail-safe mechanism of post-transcriptional silencing of unspliced HAC1 mRNA
Source: eLife journal article supplement (doi:10.7554/elife.20069), 2016-10-01

Figure 7—figure supplement 1

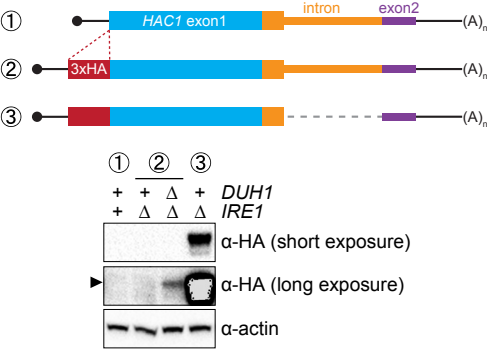

Supplement: supp [file elife-20069-supp-v1.zip]
